# Supplementary material
Source: Springer Nature journal article supplement (https://www.springermedizin.de/resource/supplementary/13075_2011_3521_MOESM6_ESM.pdf/9694716)

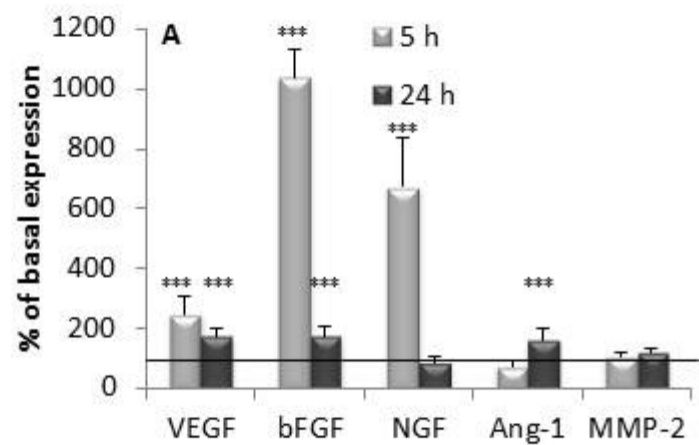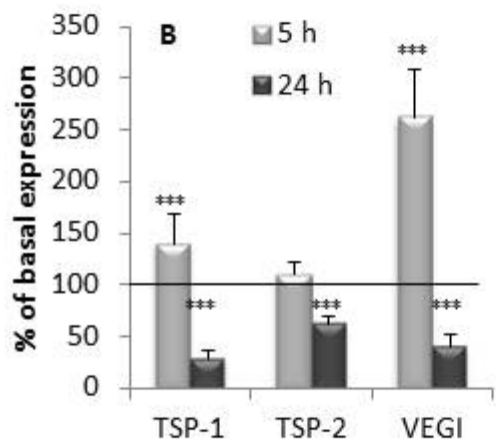

Supplement: MOESM6 [file 9694716]
